# Supplementary material for: Interleukin 10 mutant zebrafish have an enhanced interferon gamma response and improved survival against a Mycobacterium marinum infection
Source: PubMed Central journal article supplement (PMC6037744; doi:10.1038/s41598-018-28511-w), 2018-07-09
Supplement: 41598_2018_28511_MOESM1_ESM.pdf [file 41598_2018_28511_MOESM1_ESM.pdf]

***interleukin 10* mutant zebrafish have an enhanced *interferon gamma* response and improved survival against a *Mycobacterium marinum* infection**

**Sanna-Kaisa E. Harjula, Markus J.T. Ojanen, Sinja Taavitsainen, Matti Nykter, Mika Rämetsä\***

**\*Corresponding author:** Correspondence to Mika Rämetsä, phone: 358-50-4336276, Email:

mika.rametsa@uta.fi

## Supplementary Figures

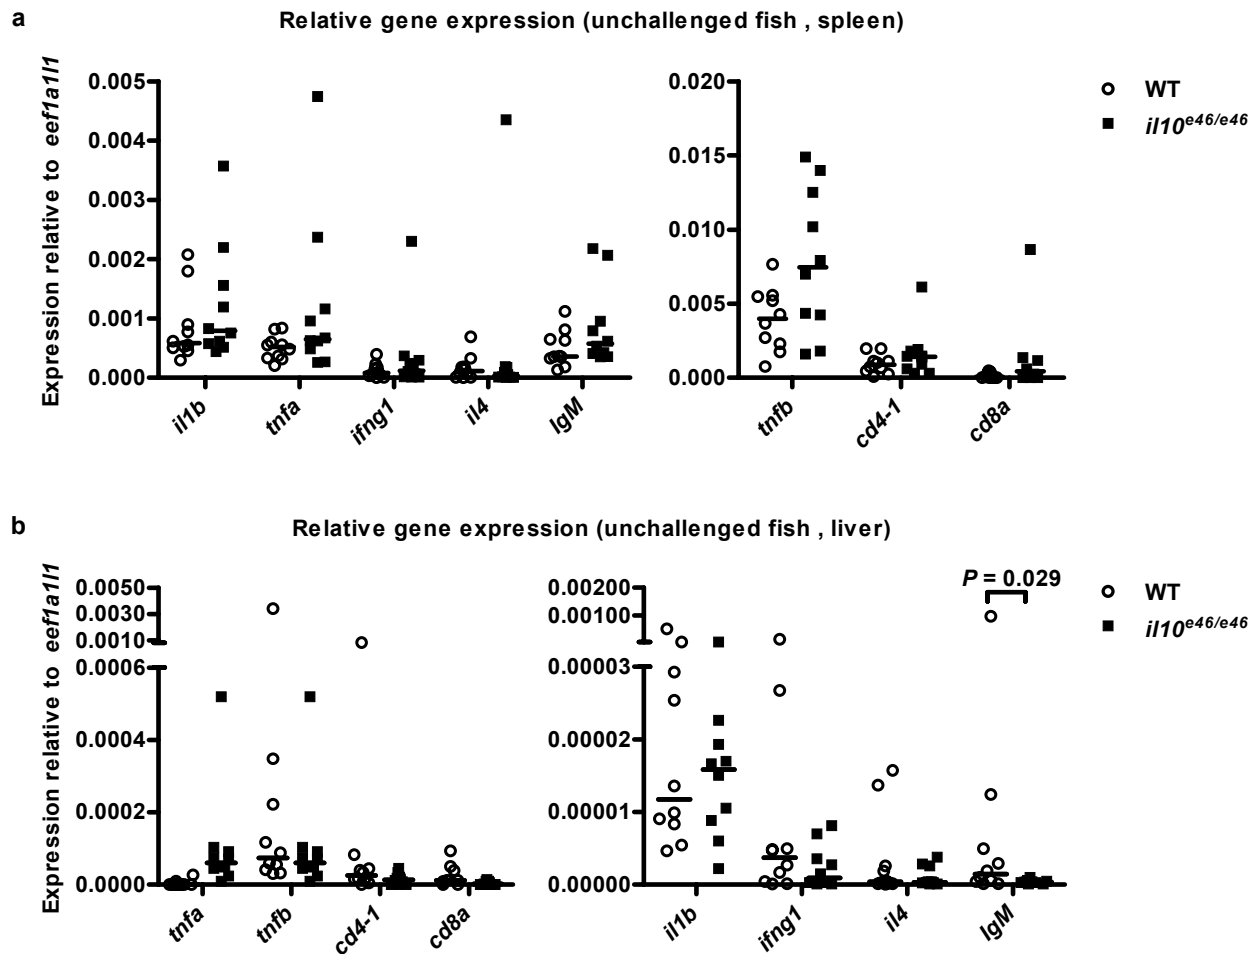

## Supplementary Figure S1

Unchallenged *il10<sup>e46/e46</sup>* zebrafish have similar expression profiles of lymphocyte markers and cytokines as WT control fish in the spleen and liver (**a - b**). The relative expression of selected proinflammatory cytokines (*il1b*, *tnfa*, *tnfb*), Th cell cytokines (*ifng1* and *il4*), T cell markers (*cd4* and *cd8*) as well as a B cell marker (*IgM*) in *il10<sup>e46/e46</sup>* mutant zebrafish and WT controls in spleen and liver from the same individuals ( $n = 10$  in both groups) were quantified with qPCR and are represented as scatter dot plot and median. Note the different scales of the y axes and the divided y axis in panel b. Gene expressions were normalized to the expression of *eef1a111*. A two-tailed Mann-Whitney test was used for the statistical comparison of differences between *il10<sup>e46/e46</sup>* zebrafish and WT controls.

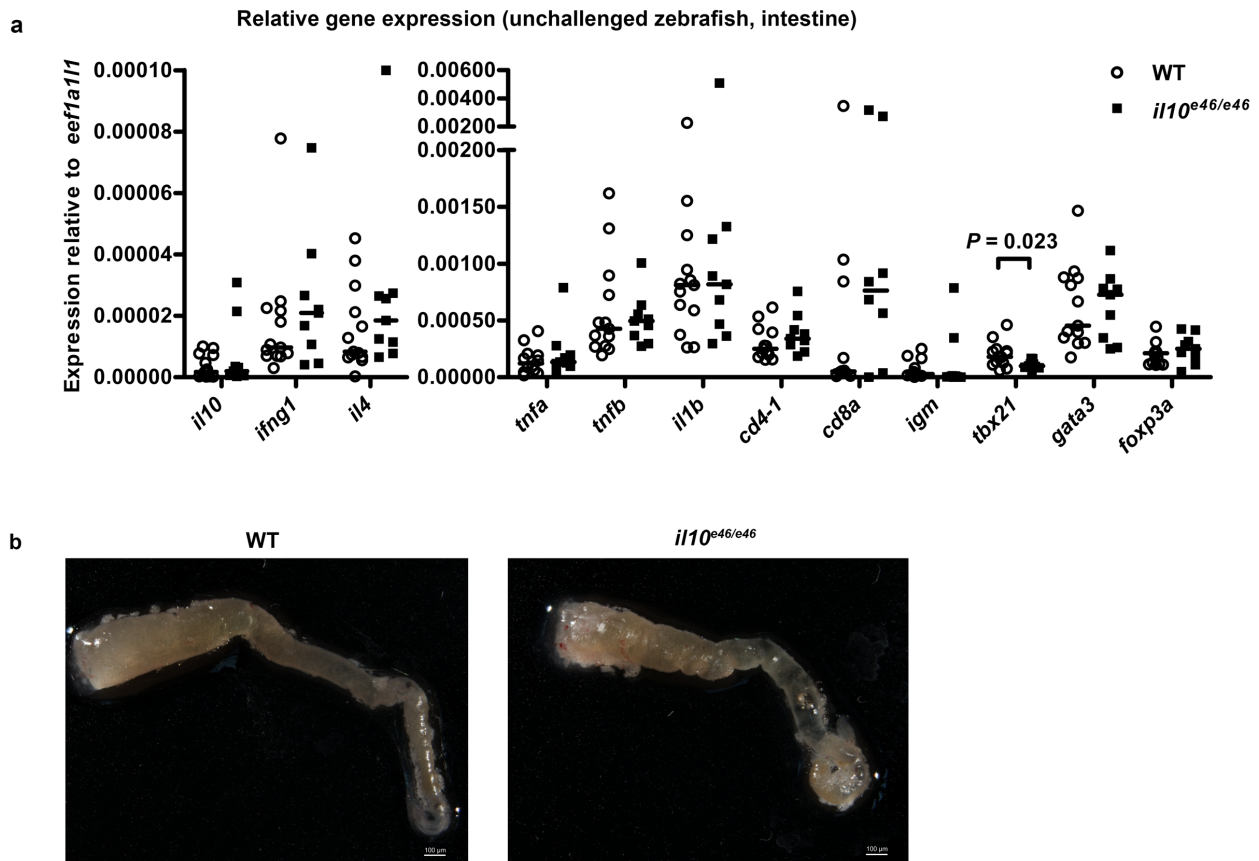

### Supplementary Figure S2

Unchallenged *il10<sup>e46/e46</sup>* zebrafish have similar expression profiles of lymphocyte markers and cytokines as WT control fish in the intestine. **(a)** The relative expression of *il10*, selected proinflammatory cytokines (*il1b*, *tnfa*, *tnfb*), Th cell cytokines (*ifng1* and *il4*), T cell markers (*cd4-1* and *cd8a*), a B cell marker (*IgM*) as well as Cd4<sup>+</sup> lymphocyte transcription factors (*tbx21*, *gata3*, *foxp3a*) in *il10<sup>e46/e46</sup>* mutant zebrafish ( $n = 9$ ) and WT controls ( $n = 13$ ) in intestine were quantified with qPCR and are represented as scatter dot plot and median. Note the different scales of the y axes and the divided y axis. Gene expressions were normalized to the expression of *eef1a111*. A two-tailed Mann-Whitney test was used for the statistical comparison of differences between *il10<sup>e46/e46</sup>* zebrafish and WT controls. **(b)** The visual appearance of *il10<sup>e46/e46</sup>* mutant and WT control zebrafish intestine was studied by microscopy ( $n = 3$  in both groups). A representative image from each group is shown.

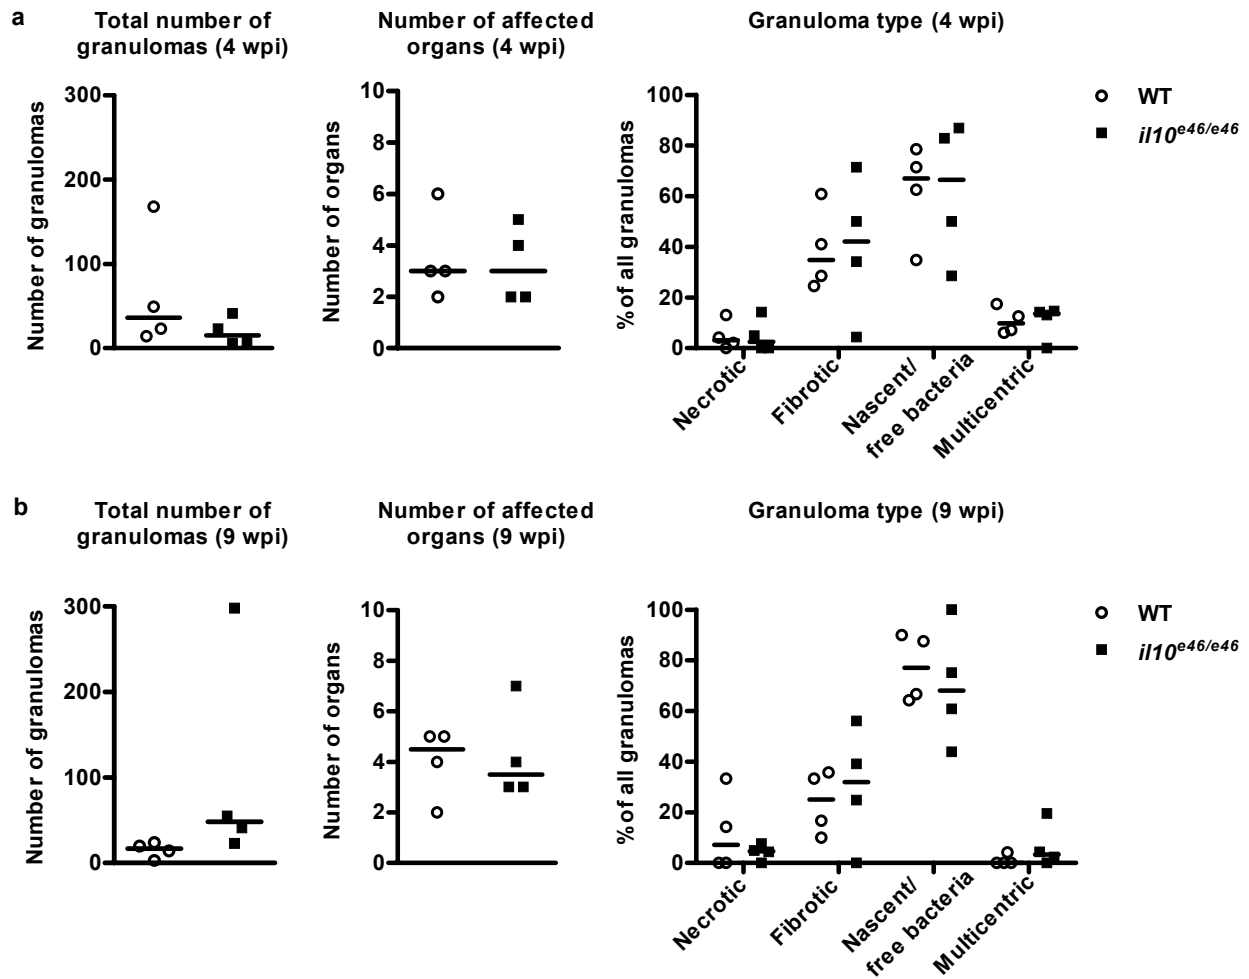

### Supplementary Figure S3

There are no differences in the quantity or quality of granulomas between *il10<sup>e46/e46</sup>* zebrafish and WT controls in histological analysis. **(a-b)** The number of *M. marinum* granulomas were counted and the affected organs and the type of granulomas were identified in *il10<sup>e46/e46</sup>* zebrafish and WT controls from Ziehl-Neelsen stained sections ( $n = 4$  in both groups at both time points) at 4 and 9 weeks post a low-dose infection (2 - 9 CFU). The granulomas were placed in one or several of the following categories: necrotic, fibrotic, multicentric, and nascent granuloma/a site of free bacteria. A two-tailed Mann-Whitney test was used for the statistical comparison of differences between *il10<sup>e46/e46</sup>* zebrafish and WT controls.

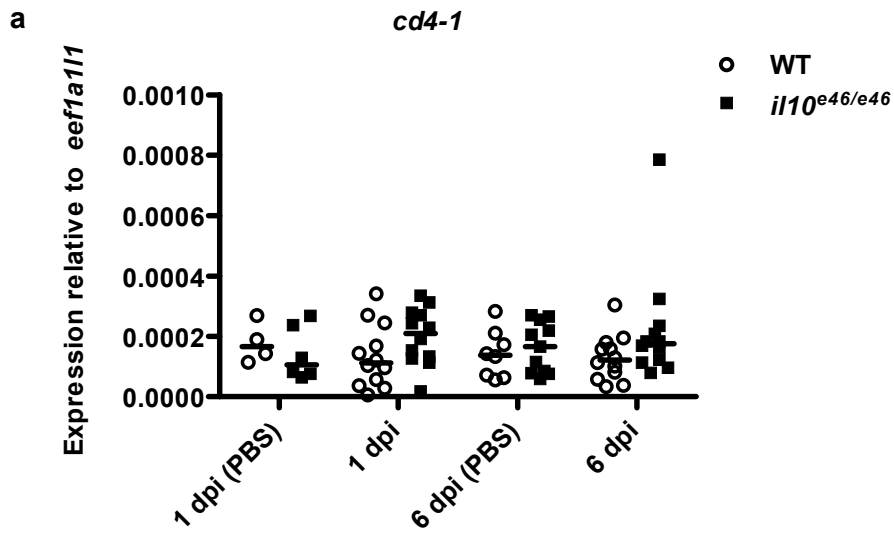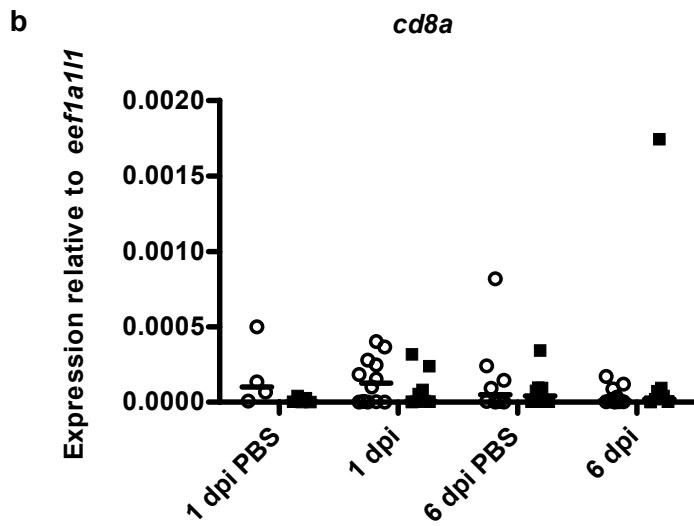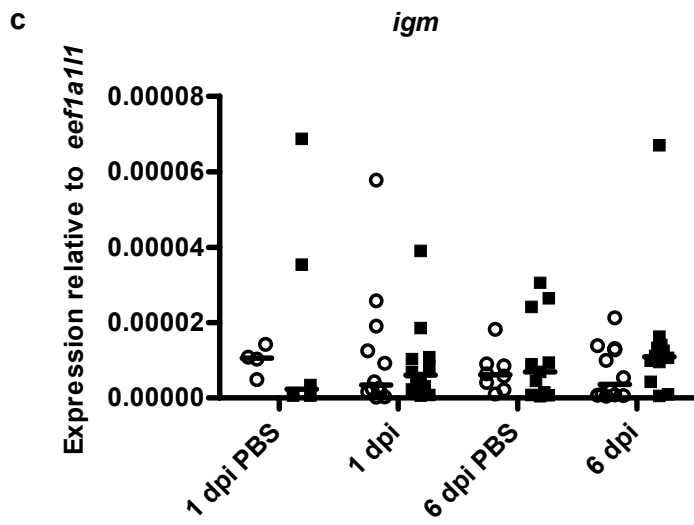

### **Supplementary Figure S4**

*il10<sup>e46/e46</sup>* mutation does not affect the expression levels of lymphocyte markers at the early stages of a low-dose mycobacterial infection. **(a - c)** The relative expression levels of T cell markers (*cd4-1* and *cd8a*) as well as the B cell marker *IgM* were measured in the abdominal organ blocks (including kidney) of *il10<sup>e46/e46</sup>* mutant fish ( $n = 4 - 12$ ) and WT controls ( $n = 5 - 12$ ) at 1 dpi and 6 days post a low-dose (2 - 9 CFU) infection and are presented as a scatter dot plot and median. Note the different scales on the y axes. Gene expressions were normalized to the expression of *eef1a111*. The data were collected from a single experiment. In panels a - c a two-tailed Mann-Whitney test was used for the statistical comparison of differences.

**Supplementary Tables S1-S3** are provided as separate files.

### **Supplementary Table S1**

All mutations found in the whole genome sequencing analysis. *P* values were calculated with Fisher's exact test,  $P < 0.05$  was considered significant.

### **Supplementary Table S2**

Stop codon or frameshift causing mutations found in the whole genome sequencing analysis. Mutations with allele fraction of  $\geq 25\%$  in either of the groups are shown here. *P* values were calculated with Fisher's exact test,  $P < 0.05$  was considered significant.

### **Supplementary Table S3**

Stop codon or frameshift causing mutations found in the whole genome sequencing analysis that differ significantly between *il10<sup>e46/e46</sup>* and WT zebrafish. *P* values were calculated with Fisher's exact test,  $P < 0.05$  was considered significant.

## Supplementary Table S4

### qPCR primers used for gene expression analysis

| Gene <sup>1</sup>      | ZFIN ID             | Human gene ortholog (HGNC) | Sequence 5' - 3'                                          | Reference |
|------------------------|---------------------|----------------------------|-----------------------------------------------------------|-----------|
| <i>eef1a1l1 (ef1a)</i> | ZDB-GENE-990415-52  | <i>EEF1A1</i>              | F CTGGAGGCCAGCTCAAACAT<br>R ATCAAGAAGAGTAGTACCGCTAGCATTAC | (80)      |
| <i>il10</i>            | ZDB-GENE-051111-1   | <i>IL10</i>                | F GCTCTGCTCACGCTTCTTC<br>R TGGTTCCAAGTCATCGTTG            | (51)      |
| <i>tnfa</i>            | ZDB-GENE-050317-1   | <i>TNF</i>                 | F GGGCAATCAACAAGATGGAAG<br>R GCAGCTGATGTGCAAAGACAC        | (35)      |
| <i>tnfb</i>            | ZDB-GENE-050601-2   | <i>TNF</i>                 | F GCATGTGATGAAGCCAAACG<br>R GATTGTCCTGAAGGGTCACC          | -         |
| <i>il1b</i>            | ZDB-GENE-040702-2   | <i>IL1B</i>                | F TGGACTTCGCAGCACAAAATG<br>R GTTCACTTCACGCTCTTGGATG       | (88)      |
| <i>cd4-1</i>           | ZDB-GENE-100922-280 | <i>CD4</i>                 | F TAAAGCACAAAGAAAGCCATG<br>R TACTCTGCGGGTTCCTGTTG         | -         |
| <i>cd8a</i>            | ZDB-GENE-060210-2   | <i>CD8A</i>                | F GGAGTACCAGATCCAGTAACACAC<br>R AACCTCCGACCAGAGATGTG      | -         |
| <i>igm</i>             | ZDB-GENE-030925-46  | <i>IGHM</i>                | F AGATCCAATACAAAGATACTATGC<br>R TGGTCAAATGGAATTGTGG       | (21)      |
| <i>tbx21</i>           | ZDB-GENE-080104-3   | <i>TBX21</i>               | F GGCCTACCAGAAATGCAGACA<br>R GGTGCGTACAGCGTGTGCATA        | (27)      |
| <i>gata3</i>           | ZDB-GENE-990415-82  | <i>GATA3</i>               | F GGATGGCACC GGTC ACTATT<br>R CAGCAGACAGCCTCCGTTT         | (27)      |
| <i>foxp3a</i>          | ZDB-GENE-061116-2   | <i>FOXP3</i>               | F CAAAAGCAGAGTGCCAGTGG<br>R CGCATAAGCAC CGATTCTGC         | (27)      |
| <i>ifng1</i>           | ZDB-GENE-040629-1   | <i>IFNG</i>                | F CTTTCCAGGCAAGAGTGCAGA<br>R TCAGCTCAAACAAAGCCTTTTCG      | (89)      |
| <i>il4</i>             | ZDB-GENE-100204-1   | <i>IL4</i>                 | F CCAGAGTGTGAATGGGATCC<br>R TTTCCAGTCCCAGGTATATGC         | -         |

<sup>1</sup> Zebrafish gene names and qPCR primer sequences are listed accompanied with the ZFIN identification codes and the names of the orthologous genes in humans. HGNC, HUGO Gene Nomenclature Committee.

## Supplementary References

88. Pressley, M. E., Phelan, P. E., 3rd, Witten, P. E., Mellon, M. T. & Kim, C. H. Pathogenesis and inflammatory response to *Edwardsiella tarda* infection in the zebrafish. *Dev. Comp. Immunol.* **29**, 501-513 (2005).
89. Vojtech, L. N., Sanders, G. E., Conway, C., Ostland, V. & Hansen, J. D. Host immune response and acute disease in a zebrafish model of *Francisella pathogenesis*. *Infect. Immun.* **77**, 914-925 (2009).
